# Supplementary material for: Cupriavidus metallidurans CH34 Possesses Aromatic Catabolic Versatility and Degrades Benzene in the Presence of Mercury and Cadmium
Source: MDPI journal article supplement (doi:10.3390/microorganisms10020484), 2022-02-21
Supplement: s1 [file s1]

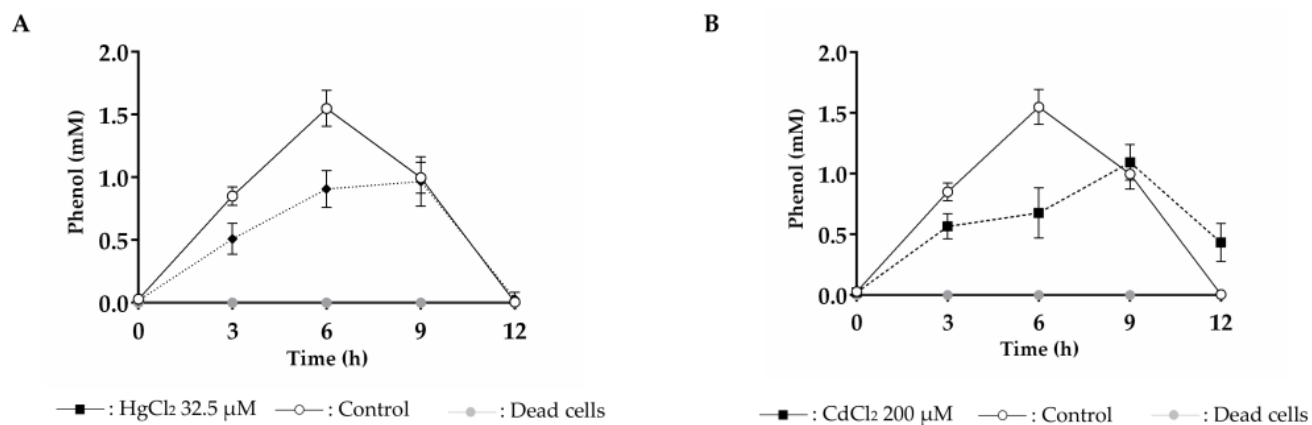

**Figure S1.** Effects of mercury and cadmium on phenol production in *C. metallidurans* CH34 during resting cell assays. **(A)** Effect of HgCl<sub>2</sub> 32.5 μM **(B)** Effect of CdCl<sub>2</sub> 200 μM. Complete depletion of phenol is observed at 12 h during control conditions. Each point is an average ± SDs of results from three independent resting cells assays.
