# Supplementary material for: Cupriavidus metallidurans CH34 Possesses Aromatic Catabolic Versatility and Degrades Benzene in the Presence of Mercury and Cadmium
Source: MDPI journal article supplement (doi:10.3390/microorganisms10020484), 2022-02-21
Supplement: s1 [file s1]

**Table S5. Statistic analyses of mercury and cadmium effects on benzene degradation and intermediates production by *C. metallidurans* CH34 and *P. putida* F1.**

| <i>C. metallidurans</i> CH34 |                    |             |                  |                    |             |                  | <i>P. putida</i> F1 |                  |                    |                  |
|------------------------------|--------------------|-------------|------------------|--------------------|-------------|------------------|---------------------|------------------|--------------------|------------------|
| Time (h)                     | Hg 32.5 $\mu$ M    |             |                  | Cd 200 $\mu$ M     |             |                  | Hg 32.5 $\mu$ M     |                  | Cd 200 $\mu$ M     |                  |
|                              | % Residual benzene | Phenol (mM) | 2-HMS ( $\mu$ M) | % Residual benzene | Phenol (mM) | 2-HMS ( $\mu$ M) | % Residual benzene  | 2-HMS ( $\mu$ M) | % Residual benzene | 2-HMS ( $\mu$ M) |
| 0                            | n/a                | ns          | ns               | n/a                | ns          | ns               | n/a                 | ns               | n/a                | ns               |
| 3                            | ns                 | ns          | *                | ns                 | *           | **               | ***                 | ***              | ns                 | ns               |
| 6                            | *                  | **          | **               | *                  | **          | ***              | ***                 | ***              | ns                 | ***              |
| 9                            | ns                 | ns          | ns               | a                  | ns          | ns               | ***                 | ***              | ns                 | *                |
| 12                           | ns                 | ns          | *                | ns                 | ns          | ns               | ***                 | **               | ns                 | ns               |

Significance results correspond to  $p$  values obtained from the t-test using control values as reference. n/a: not applicable, ns:  $p>0.05$ , \*:  $p\leq0.05$ , \*\*:  $p\leq0.01$ , \*\*\*:  $p\leq0.001$ .
