# Supplementary material for: Cupriavidus metallidurans CH34 Possesses Aromatic Catabolic Versatility and Degrades Benzene in the Presence of Mercury and Cadmium
Source: MDPI journal article supplement (doi:10.3390/microorganisms10020484), 2022-02-21
Supplement: s1 [file s1]

**Table S4. Predicted aromatic peripheral pathways in *C. metallidurans* CH34**

| Central pathway | Peripheral pathway     | Gene         | ORF (aa)           | CDS   | Function                                                 | Organism                       | Id (%) | Cov (%) | UniProtKB Accession (aa) |
|-----------------|------------------------|--------------|--------------------|-------|----------------------------------------------------------|--------------------------------|--------|---------|--------------------------|
| Catechol        | Toluene-Benzene (T2MO) | <i>tomA0</i> | RMET_RS06715 (74)  | TomA0 | Toluene-benzene-2-monooxygenase, component P0            | <i>B. vietnamensis</i> G4      | 99     | 75      | Q9ANX5 (97)              |
|                 |                        | <i>tomA1</i> | RMET_RS06710 (331) | TomA1 | Toluene-benzene-2-monooxygenase, component P1            | <i>B. vietnamensis</i> G4      | 99     | 99      | Q9ANX4 (331)             |
|                 |                        | <i>tomA2</i> | RMET_RS06705 (89)  | TomA2 | Toluene-benzene-2-monooxygenase, component P2            | <i>B. vietnamensis</i> G4      | 97     | 98      | Q9ANX3 (89)              |
|                 |                        | <i>tomA3</i> | RMET_RS06700 (519) | TomA3 | Toluene-benzene-2-monooxygenase, component P3            | <i>B. vietnamensis</i> G4      | 99     | 100     | Q9ANX2 (519)             |
|                 |                        | <i>tomA4</i> | RMET_RS06695 (118) | TomA4 | Toluene-benzene-2-monooxygenase, component P4            | <i>B. vietnamensis</i> G4      | 100    | 100     | Q9ANX1 (118)             |
|                 |                        | <i>tomA5</i> | RMET_RS06690 (354) | TomA5 | Toluene-benzene-2-monooxygenase, component P5            | <i>B. vietnamensis</i> G4      | 98     | 100     | Q9ANX0 (354)             |
|                 |                        | <i>fer2</i>  | RMET_RS06685 (118) | Fer2  | Ferredoxin                                               | <i>Pseudomonas</i> sp. CF600   | 46     | 68      | P23103 (112)             |
|                 | Toluene (TMO)          | <i>tmoA</i>  | RMET_RS06640 (500) | TmoA  | Toluene-4-monooxygenase system protein A                 | <i>P. mendocina</i> KR1        | 69     | 69      | Q00456 (500)             |
|                 |                        | <i>tmoB</i>  | RMET_RS06635 (88)  | TmoB  | Toluene-4-monooxygenase system protein B                 | <i>P. mendocina</i> KR1        | 49     | 95      | Q00457 (84)              |
|                 |                        | <i>tmoC</i>  | RMET_RS06630 (111) | TmoC  | Toluene-4-monooxygenase system protein C                 | <i>P. mendocina</i> KR1        | 53     | 100     | Q00458 (112)             |
|                 |                        | <i>tmoD</i>  | RMET_RS06625 (104) | TmoD  | Toluene-4-monooxygenase system protein D                 | <i>P. mendocina</i> KR1        | 60     | 91      | Q00459 (103)             |
|                 |                        | <i>tmoE</i>  | RMET_RS06620 (328) | TmoE  | Toluene-4-monooxygenase system protein E                 | <i>P. mendocina</i> KR1        | 60     | 91      | Q00460 (327)             |
|                 |                        | <i>tmoF</i>  | RMET_RS06615 (340) | TmoF  | Ferredoxin--NAD(+) reductase                             | <i>P. mendocina</i> KR1        | 43     | 99      | Q8GI14 (329)             |
|                 |                        | <i>tmoX</i>  | RMET_RS06590 (464) | TmoX  | Aromatic hydrocarbon TbuX/Fad membrane transport protein | <i>P. mendocina</i> KR1        | 47     | 87      | Q8KT43 (456)             |
|                 | Phenol (PH)            | <i>phyR</i>  | RMET_RS08955 (542) | PhyR  | Transcriptional activator of aromatic catabolism         | <i>Ralstonia</i> sp. KN1       | 52     | 98      | Q9RAG0 (446)             |
|                 |                        | <i>phyZ</i>  | RMET_RS31735 (65)  | PhyZ  | Phenol hydroxylase P0 protein                            | <i>Ralstonia</i> sp. KN1       | 46     | 98      | P19729 (72)              |
|                 |                        | <i>phyA</i>  | RMET_RS08945 (331) | PhyA  | Phenol hydroxylase P1 protein                            | <i>Ralstonia</i> sp. KN1       | 54     | 99      | Q9RAF8 (331)             |
|                 |                        | <i>phyB</i>  | RMET_RS08940 (90)  | PhyB  | Phenol hydroxylase P2 protein                            | <i>Ralstonia</i> sp. KN1       | 62     | 96      | Q9RAF7 (90)              |
|                 |                        | <i>phyC</i>  | RMET_RS08935 (515) | PhyC  | Phenol hydroxylase P3 protein                            | <i>Ralstonia</i> sp. KN1       | 74     | 96      | Q9RAF6 (504)             |
|                 |                        | <i>phyD</i>  | RMET_RS08930 (120) | PhyD  | Phenol hydroxylase P4 protein                            | <i>Ralstonia</i> sp. KN1       | 55     | 92      | Q9RAF5 (119)             |
|                 |                        | <i>phyE</i>  | RMET_RS08925 (356) | PhyE  | Phenol hydroxylase P5 protein                            | <i>Ralstonia</i> sp. KN1       | 62     | 100     | Q9RAF4 (356)             |
|                 | Benzoate (BDO)         | <i>benA</i>  | RMET_RS25050 (464) | BenA  | Benzoate 1,2-dioxygenase subunit alpha                   | <i>A. baylyi</i> ADP1          | 73     | 96      | P07769 (461)             |
|                 |                        | <i>benB</i>  | RMET_RS25055 (164) | BenB  | Benzoate 1,2-dioxygenase subunit beta                    | <i>A. baylyi</i> ADP1          | 70     | 98      | P07770 (169)             |
|                 |                        | <i>benC</i>  | RMET_RS25060 (339) | BenC  | Benzoate 1,2-dioxygenase electron transfer component     | <i>A. baylyi</i> ADP1          | 65     | 98      | P07771 (348)             |
|                 |                        | <i>benD</i>  | RMET_RS25065 (264) | BenD  | DHB dehydrogenase                                        | <i>A. baylyi</i> ADP1          | 62     | 100     | P07772 (261)             |
| Protocatechuate | Ferulic acid           | <i>fcs</i>   | RMET_RS25745 (631) | Fcs   | Feruloyl-CoA synthase                                    | <i>S. stellata</i> E-37        | 39     | 86      | A3K467 (610)             |
|                 | Feruloyl-CoA           | <i>ech</i>   | RMET_RS11875 (289) | Ech   | Crotonase/enoyl-CoA hydratase                            | <i>S. stellata</i> E-37        | 45     | 96      | A3K472 (261)             |
|                 | Conyferal alcohol      | <i>calA</i>  | RMET_RS05500 (342) | CalA  | Coniferyl alcohol dehydrogenase                          | <i>P. putida</i> KT2440        | 43     | 98      | Q88G86 (336)             |
|                 | Conyferal aldehyde     | <i>calB</i>  | RMET_RS00805 (476) | CalB  | Coniferyl aldehyde dehydrogenase                         | <i>P. putida</i> KT2440        | 52     | 99      | Q88CR0 (476)             |
|                 | Vanillin               | <i>vdh</i>   | RMET_RS25355 (482) | Vdh   | Vanillin dehydrogenase                                   | <i>Pseudomonas</i> sp. HR199   | 37     | 99      | O05619 (481)             |
|                 | Vanillate              | <i>ivaA</i>  | RMET_RS28335 (347) | IvaA  | Isovanillate O-demethylase                               | <i>C. testosteroni</i> BR6020  | 41     | 97      | Q2KQ79 (347)             |
|                 |                        | <i>ivaB</i>  | RMET_RS28190 (331) | IvaB  | Isovanillate O-demethylase oxidoreductase                | <i>C. testosteroni</i> BR6020  | 45     | 97      | Q2KQ78 (331)             |
|                 | 4-hydroxybenzoate      | <i>pobA1</i> | RMET_RS20795 (398) | PobA1 | 4-hydroxybenzoate-3-monooxygenase                        | <i>A. baylyi</i> ADP1          | 64     | 98      | Q03298 (404)             |
|                 |                        | <i>pobA2</i> | RMET_RS28050 (392) | PobA2 | 4-hydroxybenzoate-3-monooxygenase                        | <i>Paenibacillus</i> sp. JJ-1b | 65     | 98      | C4TP09 (394)             |
| Homogentisate   | Tyrosine               | <i>tyrB1</i> | RMET_RS05120 (398) | TyrB1 | Tyrosine aminotransferase                                | <i>P. aeruginosa</i> PAO1      | 75     | 99      | P72173 (398)             |

|                  |                 |              |                          |                                             |                                 |    |     |                |
|------------------|-----------------|--------------|--------------------------|---------------------------------------------|---------------------------------|----|-----|----------------|
| Homogentisate    |                 | <i>tyrB2</i> | RMET_RS25280 (398) TyrB2 | Tyrosine aminotransferase                   | <i>K. pneumoniae</i> ATCC 13883 | 57 | 99  | O85746 (397)   |
|                  | Phenylalanine   | <i>phhA</i>  | RMET_RS17750 (310) PhhA  | Phenylalanine 4-monooxygenase               | <i>R. solanacearum</i> GMI1000  | 80 | 99  | Q8XU39 (313)   |
|                  |                 | <i>phhB</i>  | RMET_RS17755 (99) PhhB   | 4 $\alpha$ -carbinolamine dehydratase       | <i>C. pinatubonensis</i> JMP134 | 82 | 97  | Q46VT8 (100)   |
|                  | 4-HPP           | <i>hpdD</i>  | RMET_RS25270 (357) HpdD  | 4-hydroxyphenylpyruvate dioxygenase         | <i>Pseudomonas</i> sp. P.J. 874 | 78 | 99  | P80064 (357)   |
|                  | 2-HPA           | <i>ohpA</i>  | RMET_RS25305 (780) OhpA  | Cytochrome P450 CYP116B (2-HPA hydroxylase) | <i>C. pinatubonensis</i> JMP134 |    |     | AAZ64624 (783) |
| Phenylacetyl-CoA | Phenylacetate   | <i>paaK</i>  | RMET_RS15870 (434) PaaK  | Phenylacetate-CoA ligase                    | <i>B. cenocepacia</i> J2315     | 79 | 97  | B4E7B5 (432)   |
| Benzoyl-CoA      | Benzoate (Bcl)  | <i>bclA</i>  | RMET_RS06180 (549) BclA  | Benzoate--CoA ligase                        | <i>T. aromatica</i> K172        | 62 | 93  | Q8GQN9 (527)   |
| Aminobenzoyl-CoA | Tryptophan      | <i>kynB</i>  | RMET_RS13315 (-) KynB    | Arylformamidase                             | PSEUDOGEN                       | -  | -   | -              |
|                  |                 | <i>kynU1</i> | RMET_RS13320 (418) KynU1 | Kynureninase                                | <i>P. fluorescens</i>           | 72 | 99  | P83788 (414)   |
|                  |                 | <i>kynA</i>  | RMET_RS13325 (299) KynA  | Tryptophan 2,3-dioxygenase                  | <i>C. necator</i> H16           | 88 | 100 | Q0K7X7 (294)   |
|                  |                 | <i>kynU2</i> | RMET_RS26570 (409) KynU2 | Kynureninase                                | <i>P. fluorescens</i>           | 53 | 100 | P83788 (416)   |
|                  | 2-aminobenzoate | <i>abmG</i>  | RMET_RS11035 (553) AbmG  | 2-aminobenzoate-CoA ligase                  | <i>A. evansii</i> KB740         | 58 | 99  | Q93FC0 (542)   |
