# Supplementary material for: Cupriavidus metallidurans CH34 Possesses Aromatic Catabolic Versatility and Degrades Benzene in the Presence of Mercury and Cadmium
Source: MDPI journal article supplement (doi:10.3390/microorganisms10020484), 2022-02-21
Supplement: s1 [file s1]

**Table S2. Primer sets designed and used in this study.**

| <b>Gen</b>   | <b>Name</b> | <b>Sequence (5'-3')</b> | <b>Efficiency (%)</b> | <b>Amplicon Size</b> |
|--------------|-------------|-------------------------|-----------------------|----------------------|
| <i>tomA3</i> | tomA3 Fw    | TGATGCATTTCGATGCCGAGT   | 106.8                 | 219 pb               |
|              | tomA3 Rv    | TGTCGGTGCCCAAGTCATTT    |                       |                      |
| <i>tomB</i>  | tomB Fw     | TTTTCCGCCACCCGATTCA     | 109.4                 | 241 pb               |
|              | tomB Rv     | AGACACAAATGCTCCCCGAA    |                       |                      |
| <i>tmoA</i>  | tmoA Fw     | TTCCAGCCAATCCCGTT       | 105.3                 | 228 pb               |
|              | tmoA Rv     | CATCGCAAGCAGTCGTTCAA    |                       |                      |
| <i>phyC</i>  | phyC Fw     | TCCTGTTGCTGCTTCCAGTAG   | 97.2                  | 211 pb               |
|              | phyC Rv     | TCCGGATGCCCAAGTATCAC    |                       |                      |
| <i>catA1</i> | catA1 Fw    | TTGACCTGCCCTTCCATCAC    | 101.9                 | 245 pb               |
|              | catA1 Rv    | CTCAATTTCTGCGCCGAAGC    |                       |                      |
| <i>catA2</i> | catA2 Fw    | CCTGCTTGGAACACTACTCGT   | 96.4                  | 212 pb               |
|              | catA2 Rv    | CGGCGGATACGAAGAAGTGA    |                       |                      |
| <i>tomC</i>  | tomC Fw     | CGCGGAGACAAAACGATCAA    | 99.5                  | 250 pb               |
|              | tomC Rv     | CATCAACGCCATCACCTTCAC   |                       |                      |
| <i>tomD</i>  | tomD Fw     | GGTGCCGGAACATACTTGAAA   | 109.2                 | 231 pb               |
|              | tomD Rv     | CGAAAGAGTGCGCCGATTG     |                       |                      |
| <i>rpoS</i>  | rpoS Fw     | CGAGCGAGGTGGTATGTTCA    | 92.0                  | 241 pb               |
|              | rpoS Rv     | TATGCGACCTGGTGGATTCTG   |                       |                      |
| <i>benM</i>  | benM Fw     | AGCACCTGATCGGC AAAACT   | 95.3                  | 226 pb               |
|              | benM Rv     | TCAAGGCACTCAAGGAAGGG    |                       |                      |
| <i>catM</i>  | catM Fw     | AAGCTTCATATGGCACAGCC    | 103.4                 | 210 pb               |
|              | catM Rv     | GAACCAGCGCTTTTCATTGC    |                       |                      |
| <i>poxR</i>  | poxR Fw     | CTCTGGCAGGACTCATGGGA    | 89.7                  | 248 pb               |
|              | poxR Rv     | CTGATGACGGAGTCGGGTTC    |                       |                      |
| <i>tomR</i>  | tomR Fw     | TCCCCGTTTTGCAAACTCT     | 91.3                  | 232 pb               |
|              | tomR Rv     | ACAGAAGTTCGCGTGTAGGG    |                       |                      |
| <i>gyrB</i>  | gyrB Fw     | GATGGCTACAACGAGCAGGT    | 98.1                  | 233 pb               |
|              | gyrB Rv     | TTGGTCTGCGAGCTGAACTT    |                       |                      |
