# Supplementary material for: Cupriavidus metallidurans CH34 Possesses Aromatic Catabolic Versatility and Degrades Benzene in the Presence of Mercury and Cadmium
Source: MDPI journal article supplement (doi:10.3390/microorganisms10020484), 2022-02-21
Supplement: s1 [file s1]

**Table S3. Predicted aromatic central pathways in *C. metallidurans* CH34**

| Central pathway                                  | Gene         | ORF (aa)           | CDS   | Function                                                         | Organism                        | Id (%) | Cov (%) | UniProtKB Accession (aa) |
|--------------------------------------------------|--------------|--------------------|-------|------------------------------------------------------------------|---------------------------------|--------|---------|--------------------------|
| Catechol (extradiol)                             | <i>tomR</i>  | RMET_RS06580 (614) | TomR  | Transcriptional activator of aromatic catabolism, XylR/NtrC type | <i>B. vietnamiensis</i> G4      | 97     | 98      | A4JW32 (611)             |
|                                                  | <i>tomD</i>  | RMET_RS06585 (275) | TomD  | Semialdehyde-2-hydroxymuconate hydrolase (HMSH)                  | <i>B. vietnamiensis</i> G4      | 100    | 100     | A4JW31 (275)             |
|                                                  | <i>tomI</i>  | RMET_RS06645 (63)  | TomI  | 4-oxalocrotonate tautomerase                                     | <i>B. vietnamiensis</i> G4      | 100    | 100     | A4JW27 (63)              |
|                                                  | <i>tomH</i>  | RMET_RS06650 (262) | TomH  | 4-oxalocrotonate decarboxylase                                   | <i>B. vietnamiensis</i> G4      | 99     | 99      | A4JW26 (260)             |
|                                                  | <i>tomG</i>  | RMET_RS06655 (348) | TomG  | 4-hydroxy-2-ketovalerate aldolase                                | <i>B. vietnamiensis</i> G4      | 99     | 100     | A4JW25 (343)             |
|                                                  | <i>tomF</i>  | RMET_RS06660 (303) | TomF  | Acetaldehyde-CoA dehydrogenase II                                | <i>B. vietnamiensis</i> G4      | 99     | 100     | A4JW24 (299)             |
|                                                  | <i>tomE</i>  | RMET_RS06665 (262) | TomE  | 2-hydroxypent-2,4-dienoate hydratase                             | <i>B. vietnamiensis</i> G4      | 99     | 100     | A4JW23 (258)             |
|                                                  | <i>tomC</i>  | RMET_RS06670 (503) | TomC  | Semialdehyde-2-hydroxymuconate dehydrogenase (HMSD)              | <i>B. vietnamiensis</i> G4      | 98     | 100     | A4JW22 (493)             |
|                                                  | <i>tomB</i>  | RMET_RS06680 (314) | TomB  | Catechol-2,3-dioxygenase (C23O)                                  | <i>B. vietnamiensis</i> G4      | 100    | 100     | A4JW20 (311)             |
| Catechol (intradiol $\beta$ -ketoadipate)        | <i>catA1</i> | RMET_RS08920 (305) | CatA1 | Catechol-1,2-dioxygenase (C12O)                                  | <i>A. lwoffii</i> K24           | 71     | 84      | O33950 (275)             |
|                                                  | <i>catD</i>  | RMET_RS25015 (258) | CatD  | 3-oxoadipate enol-lactonase                                      | <i>A. baylyi</i> ADP1           | 44     | 96      | P00632 (267)             |
|                                                  | <i>catC</i>  | RMET_RS25025 (92)  | CatC  | Muconolactone delta-isomerase                                    | <i>C. pinatubonensis</i> JMP134 | 84     | 100     | P80573 (92)              |
|                                                  | <i>catB</i>  | RMET_RS25030 (374) | CatB  | Muconate cycloisomerase                                          | <i>C. pinatubonensis</i> JMP134 | 93     | 98      | P08310 (375)             |
|                                                  | <i>catM</i>  | RMET_RS25035 (291) | CatM  | LysR family transcriptional regulator                            | <i>P. putida</i> PSR2000        | 58     | 100     | P20667 (289)             |
|                                                  | <i>benM</i>  | RMET_RS25040 (305) | BenM  | LysR family transcriptional regulator                            | <i>A. baylyi</i> ADP1           | 48     | 98      | O68014 (304)             |
|                                                  | <i>catA2</i> | RMET_RS25045 (307) | CatA2 | Catechol-1,2-dioxygenase                                         | <i>A. lwoffii</i> K24           | 65     | 93      | O33948 (275)             |
| Protocatechuate (intradiol $\beta$ -ketoadipate) | <i>pcaI</i>  | RMET_RS19060 (229) | PcaI  | 3-oxoacid CoA-transferase subunit A                              | <i>P. putida</i> PRS2000        | 74     | 93      | Q01103 (231)             |
|                                                  | <i>pcaJ</i>  | RMET_RS19065 (215) | PcaJ  | 3-oxoacid CoA-transferase subunit B                              | <i>P. putida</i> KT2440         | 75     | 96      | P0A101 (213)             |
|                                                  | <i>pcaF</i>  | RMET_RS19070 (400) | PcaF  | 3-oxoadipyl-CoA thiolase                                         | <i>A. baylyi</i> ADP1           | 68     | 100     | Q43974 (401)             |
|                                                  | <i>pcaK</i>  | RMET_RS20760 (459) | PcaK  | 4-hydroxybenzoate transporter                                    | <i>P. putida</i> PRS2000        | 57     | 95      | Q51955 (448)             |
|                                                  | <i>pcaQ</i>  | RMET_RS20765 (317) | PcaQ  | LysR family transcriptional regulator                            | <i>E. coli</i> K-12             | 42     | 94      | P77171 (307)             |
|                                                  | <i>pcaH</i>  | RMET_RS20770 (237) | PcaH  | Protocatechuate 3,4-dioxygenase subunit beta                     | <i>B. cepacia</i> DBO1          | 63     | 93      | P15110 (235)             |
|                                                  | <i>pcaG</i>  | RMET_RS20775 (189) | PcaG  | Protocatechuate 3,4-dioxygenase subunit alpha                    | <i>P. putida</i> KT2440         | 43     | 100     | P00436 (201)             |
|                                                  | <i>pcaB</i>  | RMET_RS20780 (490) | PcaB  | 3-carboxy- <i>cis,cis</i> -muconate cycloisomerase               | <i>A. baylyi</i> ADP1           | 49     | 96      | Q59092 (451)             |
|                                                  | <i>pcaL</i>  | RMET_RS20785 (392) | PcaL  | Enol-lactone hydrolase/4-CML decarboxylase                       | <i>R. jostii</i> RHA1           | 42     | 95      | Q0SH24 (400)             |
| Gallate                                          | <i>pmdE</i>  | RMET_RS19250 (341) | PmdE  | 4-oxalomesaconate hydratase                                      | <i>C. testosteroni</i> BR6020   | 76     | 99      | Q93PS9 (342)             |
|                                                  | <i>galD</i>  | RMET_RS19255 (382) | GalD  | 4-oxalomesaconate tautomerase                                    | <i>P. putida</i> KT2440         | 51     | 99      | Q88JY0 (361)             |
|                                                  | <i>galR</i>  | RMET_RS19260 (406) | GalR  | LysR family transcriptional regulator                            | <i>P. putida</i> KT2440         | 43     | 98      | Q88JX7 (397)             |

|                       |             |                    |      |                                                             |                              |    |     |                  |
|-----------------------|-------------|--------------------|------|-------------------------------------------------------------|------------------------------|----|-----|------------------|
|                       | <i>galT</i> | RMET_RS19265 (441) | GalT | Aromatic acid/H <sup>+</sup> symport family MFS transporter | <i>P. putida</i> KT2440      | 55 | 97  | E8ZB61 (449)     |
|                       | <i>galA</i> | RMET_RS19270 (430) | GaIA | Gallate 2,3-dioxygenase                                     | <i>P. putida</i> KT2440      | 64 | 99  | Q88JX5 (420)     |
|                       | <i>galB</i> | RMET_RS21720 (245) | GalB | 4-oxalomesaconate hydratase                                 | <i>P. putida</i> KT2440      | 77 | 100 | Q88JX8 (258)     |
|                       | <i>galC</i> | RMET_RS21725 (237) | GalC | 4-carboxy-4-hydroxy-2-oxoadipate aldolase                   | <i>P. putida</i> KT2440      | 60 | 96  | Q88JX9 (238)     |
| Homogentisate         | <i>hmgC</i> | RMET_RS01425 (215) | HmgC | Maleylacetoacetate isomerase                                | <i>P. xenovorans</i> LB400   | 64 | 100 | Q140J8 (214)     |
|                       | <i>hmgA</i> | RMET_RS22545 (442) | HmgA | Homogentisate 1,2-dioxygenase                               | <i>P. xenovorans</i> LB400   | 81 | 98  | Q140K0 (439)     |
|                       | <i>hmgB</i> | RMET_RS22550 (420) | HmgB | Fumarylacetoacetase                                         | <i>P. xenovorans</i> LB400   | 65 | 96  | Q144Z1 (419)     |
| Hydroxyquinol         | <i>pnpC</i> | RMET_RS25940 (296) | PnpC | Hydroxyquinol 1,2-dioxygenase                               | <i>P. putida</i> DDL-E4      | 68 | 95  | C6FI44 (290)     |
|                       | <i>pnpE</i> | RMET_RS25945 (355) | PnpE | Maleylacetate reductase                                     | <i>P. putida</i> DDL-E4      | 73 | 100 | C6FI43 (355)     |
| Benzoyl-CoA           | <i>boxA</i> | RMET_RS06160 (415) | BoxA | Benzoyl-CoA oxygenase component A                           | <i>A. Evansii</i> KB740      | 62 | 99  | Q9AIX6 (414)     |
|                       | <i>boxB</i> | RMET_RS06165 (474) | BoxB | Benzoyl-CoA oxygenase component B                           | <i>A. Evansii</i> KB740      | 72 | 99  | Q9AIX7 (473)     |
|                       | <i>boxC</i> | RMET_RS06170 (558) | BoxC | Benzoyl-CoA-dihydrodiol lyase                               | <i>A. Evansii</i> KB740      | 70 | 97  | Q84HH6 (555)     |
|                       | <i>boxR</i> | RMET_RS06175 (316) | BoxR | Transcriptional regulator                                   | <i>Azoarcus</i> sp. CIB      | 50 | 91  | G8B2G2 (300)     |
| Phenylacetyl-CoA      | <i>paaH</i> | RMET_RS04900 (507) | PaaH | 3-hydroxybutyryl-CoA dehydrogenase                          | <i>B. cenocepacia</i> J2315  | 41 | 94  | B4EL90 (518)     |
|                       | <i>paaF</i> | RMET_RS15855 (258) | PaaF | Enoyl-CoA hydratase                                         | <i>B. cenocepacia</i> J2315  | 84 | 100 | B4E7C0 (258)     |
|                       | <i>paaG</i> | RMET_RS15860 (280) | PaaG | 2-(1,2-epoxy-1,2-dihydrophenyl)acetyl-CoA isomerase         | <i>B. cenocepacia</i> J2315  | 75 | 93  | B4E7B7 (263)     |
|                       | <i>paaI</i> | RMET_RS15865 (146) | PaaI | Hydroxyphenylacetyl-CoA thioesterase PaaI                   | <i>B. cenocepacia</i> J2315  | 73 | 94  | B4E7B6 (150)     |
|                       | <i>paaA</i> | RMET_RS16925 (335) | PaaA | 1,2-phenylacetyl-CoA epoxidase subunit A                    | <i>B. cenocepacia</i> J2315  | 81 | 97  | B4E5A2 (332)     |
|                       | <i>paaB</i> | RMET_RS16930 (95)  | PaaB | 1,2-phenylacetyl-CoA epoxidase subunit B                    | <i>B. cenocepacia</i> J2315  | 86 | 98  | B4E5A1 (94)      |
|                       | <i>paaC</i> | RMET_RS16935 (285) | PaaC | 1,2-phenylacetyl-CoA epoxidase subunit C                    | <i>B. cenocepacia</i> J2315  | 67 | 97  | B4E5A0 (267)     |
|                       | <i>paaD</i> | RMET_RS16940 (202) | PaaD | Phenylacetate-CoA oxygenase subunit PaaD                    | <i>B. cenocepacia</i> J2315  | 69 | 91  | B4E599 (184)     |
|                       | <i>paaE</i> | RMET_RS16945 (361) | PaaE | Phenylacetate-CoA oxygenase/reductase subunit PaaE          | <i>B. cenocepacia</i> J2315  | 59 | 99  | B4E598 (362)     |
| 2-aminobenzoyl-CoA    | <i>paaJ</i> | RMET_RS19070 (400) | PaaJ | $\beta$ -ketoadipyl-CoA thiolase                            | <i>B. cenocepacia</i> J2315  | 88 | 100 | B4E7B8 (400)     |
|                       | <i>abmE</i> | RMET_RS11025 (137) | AbmE | Translation inhibitor protein                               | <i>A. Evansii</i> KB740      | 60 | 96  | Q93FB4 (132)     |
|                       | <i>abmD</i> | RMET_RS11040 (388) | AbmD | Acyl-CoA dehydrogenase                                      | <i>A. Evansii</i> KB740      | 70 | 94  | Q93FB5 (401)     |
|                       | <i>abmC</i> | RMET_RS11045 (283) | AbmC | Enoyl-CoA hydratase/isomerase                               | <i>A. Evansii</i> KB740      | 70 | 98  | Q93FB6 (281)     |
|                       | <i>abmB</i> | RMET_RS11050 (264) | AbmB | 3-Hydroxyacyl-CoA dehydrogenase                             | <i>A. Evansii</i> KB740      | 64 | 94  | Q93FB7 (270)     |
|                       | <i>abmA</i> | RMET_RS11055 (791) | AbmA | 2-Aminobenzoyl-CoA monooxygenase/reductase                  | <i>A. Evansii</i> KB740      | 66 | 99  | Q93FB8 (773)     |
| 3-hydroxyanthranilate | <i>onbC</i> | RMET_RS26575 (174) | OnbC | 3-hydroxyanthranilate 3,4-dioxygenase                       | <i>P. phytofirmans</i> PsJN  | 88 | 100 | B2T2S5 (174)     |
|                       | <i>onbR</i> | RMET_RS26580 (354) | OnbR | LysR family transcriptional regulator                       | <i>Cupriavidus</i> sp. ST-14 | 63 | 98  | A0A0K0PM17 (320) |

|             |                           |      |                                                        |                              |    |    |                  |
|-------------|---------------------------|------|--------------------------------------------------------|------------------------------|----|----|------------------|
| <i>onbE</i> | <i>RMET_RS26640 (487)</i> | OnbE | 2-aminomuconic 6-semialdehyde dehydrogenase            | <i>Cupriavidus</i> sp. ST-14 | 71 | 97 | A0A0K0PM01 (496) |
| <i>onbH</i> | <i>RMET_RS26645 (273)</i> | OnbH | 2-oxopent-4-dienoate hydratase                         | <i>Cupriavidus</i> sp. ST-14 | 67 | 90 | A0A0K0PLY5 (275) |
| <i>onbJ</i> | <i>RMET_RS26650 (314)</i> | OnbJ | Acetaldehyde dehydrogenase                             | <i>Cupriavidus</i> sp. ST-14 | 73 | 94 | A0A0K0PN84 (316) |
| <i>onbI</i> | <i>RMET_RS26655 (345)</i> | OnbI | 4-hydroxy-2-oxovalerate aldolase                       | <i>Cupriavidus</i> sp. ST-14 | 79 | 98 | A0A0K0PMH1 (346) |
| <i>onbG</i> | <i>RMET_RS26660 (254)</i> | OnbG | 4-oxalocrotonate decarboxylase                         | <i>P. fluorescens</i> KU-7   | 73 | 77 | Q83V28 (251)     |
| <i>onbF</i> | <i>RMET_RS26665 (145)</i> | OnbF | 2-aminomuconate deaminase                              | <i>P. fluorescens</i> KU-7   | 75 | 98 | Q83V27 (143)     |
| <i>onbD</i> | <i>RMET_RS26670 (333)</i> | OnbD | 2-amino-3-carboxymuconate 6-semialdehyde decarboxylase | <i>Cupriavidus</i> sp. ST-14 | 71 | 96 | A0A0K0PM06 (340) |

---
