# Supplementary material for: Cupriavidus metallidurans CH34 Possesses Aromatic Catabolic Versatility and Degrades Benzene in the Presence of Mercury and Cadmium
Source: MDPI journal article supplement (doi:10.3390/microorganisms10020484), 2022-02-21
Supplement: s1 [file s1]

**Table S1. Bacterial multicomponent monooxygenases operon of *Cupriavidus metallidurans* strain CH34 and other Proteobacteria.**

| Classification by      |            | Operon                 | BMMs                            | Organism                                       | Location | Accession N°    |
|------------------------|------------|------------------------|---------------------------------|------------------------------------------------|----------|-----------------|
| Notomista et al., 2003 | This study |                        |                                 |                                                |          |                 |
| Group I                | Clade IA   | <i>phyZABCDE</i>       | Phenol hydroxylase              | <i>Cupriavidus metallidurans</i> CH34          | C1       | CP000352        |
|                        |            | <i>phlK1L1M1N1O1P1</i> | Phenol hydroxylase              | <i>Cupriavidus pinatubonensis</i> JMP134       | C1       | NC_007347       |
|                        |            | <i>dmpKLMNOPQ</i>      | Phenol hydroxylase              | <i>Sphingobium phenoxylbenzoativorans</i> SC_3 | -        | KX823580        |
|                        |            | <i>phyZABCDE</i>       | Phenol hydroxylase              | <i>Ralstonia</i> sp. KN1                       | -        | AB031996        |
|                        | Clade IIB  | <i>tbmABCDEF</i>       | Toluene/benzene 2-monooxygenase | <i>Burkholderia cepacia</i> JS150              | -        | L40033          |
|                        |            | <i>tbc1ABCDEF</i>      | Phenol hydroxylase              | <i>Burkholderia cepacia</i> JS150              | -        | AF282897        |
|                        |            | <i>phlK2L2M2N2O2P2</i> | Phenol hydroxylase              | <i>Cupriavidus pinatubonensis</i> JMP134       | C2       | NC_007348       |
|                        |            | <i>aphKLMNOP</i>       | Phenol hydroxylase              | <i>Comamonas testosteroni</i> TA441            | -        | NZ_BKBW01000011 |
|                        |            | <i>tomA0A1A2A3A4A5</i> | Toluene 2-monooxygenase         | <i>Cupriavidus metallidurans</i> CH34          | C1       | CP000352        |
|                        |            | <i>tomA0A1A2A3A4A5</i> | Toluene 2-monooxygenase         | <i>Burkholderia vietnamensis</i> G4            | pBVIE04  | CP000620        |
|                        | Clade IC   | <i>dmpKLMNOP</i>       | Phenol hydroxylase              | <i>Alcaligenes aquatilis</i> QD168             | C        | CP032153        |
|                        |            | <i>dmpKLMNOP</i>       | Phenol hydroxylase              | <i>Pseudomonas putida</i> CF600                | pVI150   | AB910524        |
|                        |            | <i>phhKLMNOP</i>       | Phenol hydroxylase              | <i>Pseudomonas putida</i> P35X                 | -        | X79063          |
| Group II               | -          | <i>tbc2ABCDEF</i>      | Toluene/benzene 2-monooxygenase | <i>Burkholderia cepacia</i> JS150              | -        | AF282898        |
|                        |            | <i>tbuA1UBVA2C</i>     | Toluene-3-monooxygenase         | <i>Ralstonia pickettii</i> PKO1                | -        | AY541701        |
|                        |            | <i>tbcABCDEF</i>       | Toluene monooxygenase           | <i>Cupriavidus pinatubonensis</i> JMP134       | C2       | NC_007348       |
|                        |            | <i>tmoABCDEF</i>       | Toluene monooxygenase           | <i>Cupriavidus metallidurans</i> CH34          | C1       | CP000352        |
|                        |            | <i>tmoABCDEF</i>       | Toluene-4-monooxygenase         | <i>Pseudomonas mendocina</i> KR1               | -        | AY552601        |
|                        |            | <i>tmoABCDEF</i>       | Toluene-3-monooxygenase         | <i>Pseudomonas</i> sp. M4                      | -        | KJ735680        |
